# Supplementary material for: Evaluation of the retreatability of bioceramic root canal sealers with various formulations in simulated grooves
Source: PeerJ journal article supplement (doi:10.7717/peerj.20398), 2025-12-02
Supplement: Data.zip [file data.xlsx]

## Sheet: Sayfa1
sealer	region	score
1	1	0
1	1	0
1	1	0
1	1	0
1	1	1
1	1	1
1	1	3
1	1	0
1	1	0			sealer	region	score
1	1	0			1. CeraSeal	1 coronal	0 = no sealer in the groove
1	1	0			2. Bio-C Sealer	2 apical	1 = sealer in less than half of the groove
1	1	0			3. BioRoot RCS		2 = sealer in more than half of the groove
2	1	2			4. Endoseal MTA		3 = complete filling of the groove.
2	1	2			5. AH Plus Bioceramic Sealer
2	1	2
2	1	1
2	1	3
2	1	3
2	1	3
2	1	3
2	1	3
2	1	2
2	1	1
2	1	3
3	1	2
3	1	2
3	1	0
3	1	2
3	1	1
3	1	1
3	1	2
3	1	0
3	1	0
3	1	0
3	1	1
3	1	0
4	1	0
4	1	0
4	1	0
4	1	0
4	1	0
4	1	2
4	1	0
4	1	0
4	1	0
4	1	3
4	1	0
4	1	1
5	1	1
5	1	0
5	1	0
5	1	0
5	1	0
5	1	0
5	1	0
5	1	0
5	1	0
5	1	0
5	1	1
5	1	1
1	2	1
1	2	1
1	2	3
1	2	1
1	2	2
1	2	0
1	2	2
1	2	2
1	2	0
1	2	2
1	2	1
1	2	0
2	2	2
2	2	2
2	2	1
2	2	2
2	2	3
2	2	1
2	2	3
2	2	2
2	2	1
2	2	3
2	2	3
2	2	3
3	2	0
3	2	0
3	2	1
3	2	0
3	2	0
3	2	1
3	2	3
3	2	0
3	2	3
3	2	1
3	2	0
3	2	0
4	2	0
4	2	3
4	2	0
4	2	1
4	2	2
4	2	2
4	2	1
4	2	3
4	2	1
4	2	3
4	2	0
4	2	1
5	2	1
5	2	1
5	2	1
5	2	0
5	2	0
5	2	0
5	2	1
5	2	1
5	2	1
5	2	0
5	2	1
5	2	1
